# Supplementary material
Source: HighWire-hosted journal article supplement (https://thorax.bmj.com/content/73/1/7)
Supplement: inline-supplementary-material-1 [file inline-supplementary-material-1.pdf]

Supplementary Document for

Critical Patient Outcomes to Evaluate after Acute Respiratory Failure: Perspectives of  
ARDS Survivors, Their Family, and Researchers

Victor D. Dinglas, MPH<sup>1,2</sup>  
Caroline M. Chessare, MS<sup>1,2</sup>  
Wesley E. Davis, BA<sup>1</sup>  
Ann Parker, MD<sup>1,2</sup>  
Lisa Aronson Friedman, ScM<sup>1,2</sup>  
Elizabeth Colantuoni, PhD<sup>1,3</sup>  
Clifton O. Bingham III, MD<sup>4,5,6</sup>  
Alison E. Turnbull, DVM, MPH, PhD<sup>1,2,7</sup>  
Dale M. Needham, FCPA, MD, PhD<sup>1,2,8</sup>

<sup>1</sup>Outcomes After Critical Illness and Surgery Group, Johns Hopkins University, Baltimore, MD

<sup>2</sup>Division of Pulmonary and Critical Care Medicine, School of Medicine, Johns Hopkins University, Baltimore, MD

<sup>3</sup>Department of Biostatistics, Bloomberg School of Public Health, Johns Hopkins University, Baltimore, MD, USA

<sup>4</sup>Johns Hopkins Arthritis Center, Johns Hopkins University, Baltimore, MD

<sup>5</sup>Rheumatic Diseases Research Core Center, Johns Hopkins University, Baltimore, MD

<sup>6</sup>Divisions of Rheumatology and Allergy and Clinical Immunology, Johns Hopkins University, Baltimore, MD

<sup>7</sup>Department of Epidemiology, Bloomberg School of Public Health, Johns Hopkins University, Baltimore, MD

<sup>8</sup>Department of Physical Medicine and Rehabilitation, School of Medicine, Johns Hopkins University, Baltimore

**Supplementary Table 1. List of 19 outcome domains and additional descriptions provided to respondents**

|                                                                                                                                                                                                    |
|----------------------------------------------------------------------------------------------------------------------------------------------------------------------------------------------------|
| Survival (How long do people live after leaving the ICU?)                                                                                                                                          |
| Pain                                                                                                                                                                                               |
| Fatigue (Are you feeling tired, having too little energy to get through the day, or needing more rest?)                                                                                            |
| Muscle and/or nerve function (Have you felt weak, sore, or numb?)                                                                                                                                  |
| Physical function and symptoms (How easy it is to walk, dress, or eat?)                                                                                                                            |
| Pulmonary function and symptoms (Do you have trouble breathing, shortness of breath, or cough?)                                                                                                    |
| Swallowing function and symptoms (Do you have any trouble swallowing foods or liquids?)                                                                                                            |
| Gastrointestinal function and symptoms (Do you have stomachaches, nausea/vomiting, diarrhea, constipation, gas, or indigestion?)                                                                   |
| Sleep function and symptoms (Do you have trouble falling asleep, staying asleep, or a need for a sleeping medication?)                                                                             |
| Sexual function and symptoms (Do you have a decreased desire for sex, inability to have sex, or pain or discomfort during sex?)                                                                    |
| Cognitive function and symptoms (Do you have problems with memory, communication, concentrating, or understanding instructions?)                                                                   |
| Mental health conditions and symptoms (Do you have trouble with emotions and mood, anxiety, depression, posttraumatic stress disorder, or worrying?)                                               |
| Type of residence (When you left the ICU, did you go to a rehabilitation center, nursing home, or to your own home?)                                                                               |
| Return to work or prior activities (Are you doing the same things you did before the ICU? Did you return to your prior job full-time or part-time?)                                                |
| Healthcare resource utilization (Are you seeing more doctors or physical therapists, taking new medications, or have you returned to the hospital? Do you need help making doctors' appointments?) |
| Financial impact on patient (Are you dealing with hospital bills or lost income from time off work? Do you have to pay someone to help with your care or transportation?)                          |
| Impact on family and/or caregivers (Do you feel you are a burden on family or friends? How does being sick affect other people in your life?)                                                      |
| Social roles, activities, or relationships (Are you still able to connect with others, maintain friendships, and romantic relationships? Able to complete activities with/for others?)             |
| Satisfaction with life or personal enjoyment                                                                                                                                                       |

**Supplementary Table 2. Demonstrating low kappa<sup>a</sup> despite relatively high exact agreement rate**

|         |                   | Family            |          |         |       | Total          |
|---------|-------------------|-------------------|----------|---------|-------|----------------|
|         |                   | Strongly Disagree | Disagree | Neutral | Agree | Strongly Agree |
| Patient | Strongly Disagree | 0                 | 0        | 0       | 0     | 0              |
|         | Disagree          | 0                 | 0        | 0       | 1     | 0              |
|         | Neutral           | 0                 | 0        | 0       | 1     | 0              |
|         | Agree             | 0                 | 0        | 1       | 12    | 7              |
|         | Strongly Agree    | 0                 | 0        | 1       | 18    | 14             |
|         | Total             | 0                 | 0        | 2       | 32    | 21             |

<sup>a</sup>For the Pain domain, kappa was 0.056 (95% confidence interval, -0.16 to 0.27) despite 47% exact agreement rate between patients and family. This is due to unbalanced marginal totals,(25) i.e. clustering towards one end of the scale. (Highlighted cells designate exact agreements.).

**Supplementary Figure.1 Support for requiring measurement of the domain in all studies of post-hospital survivorship in acute respiratory failure patients (page 1 of 3)**

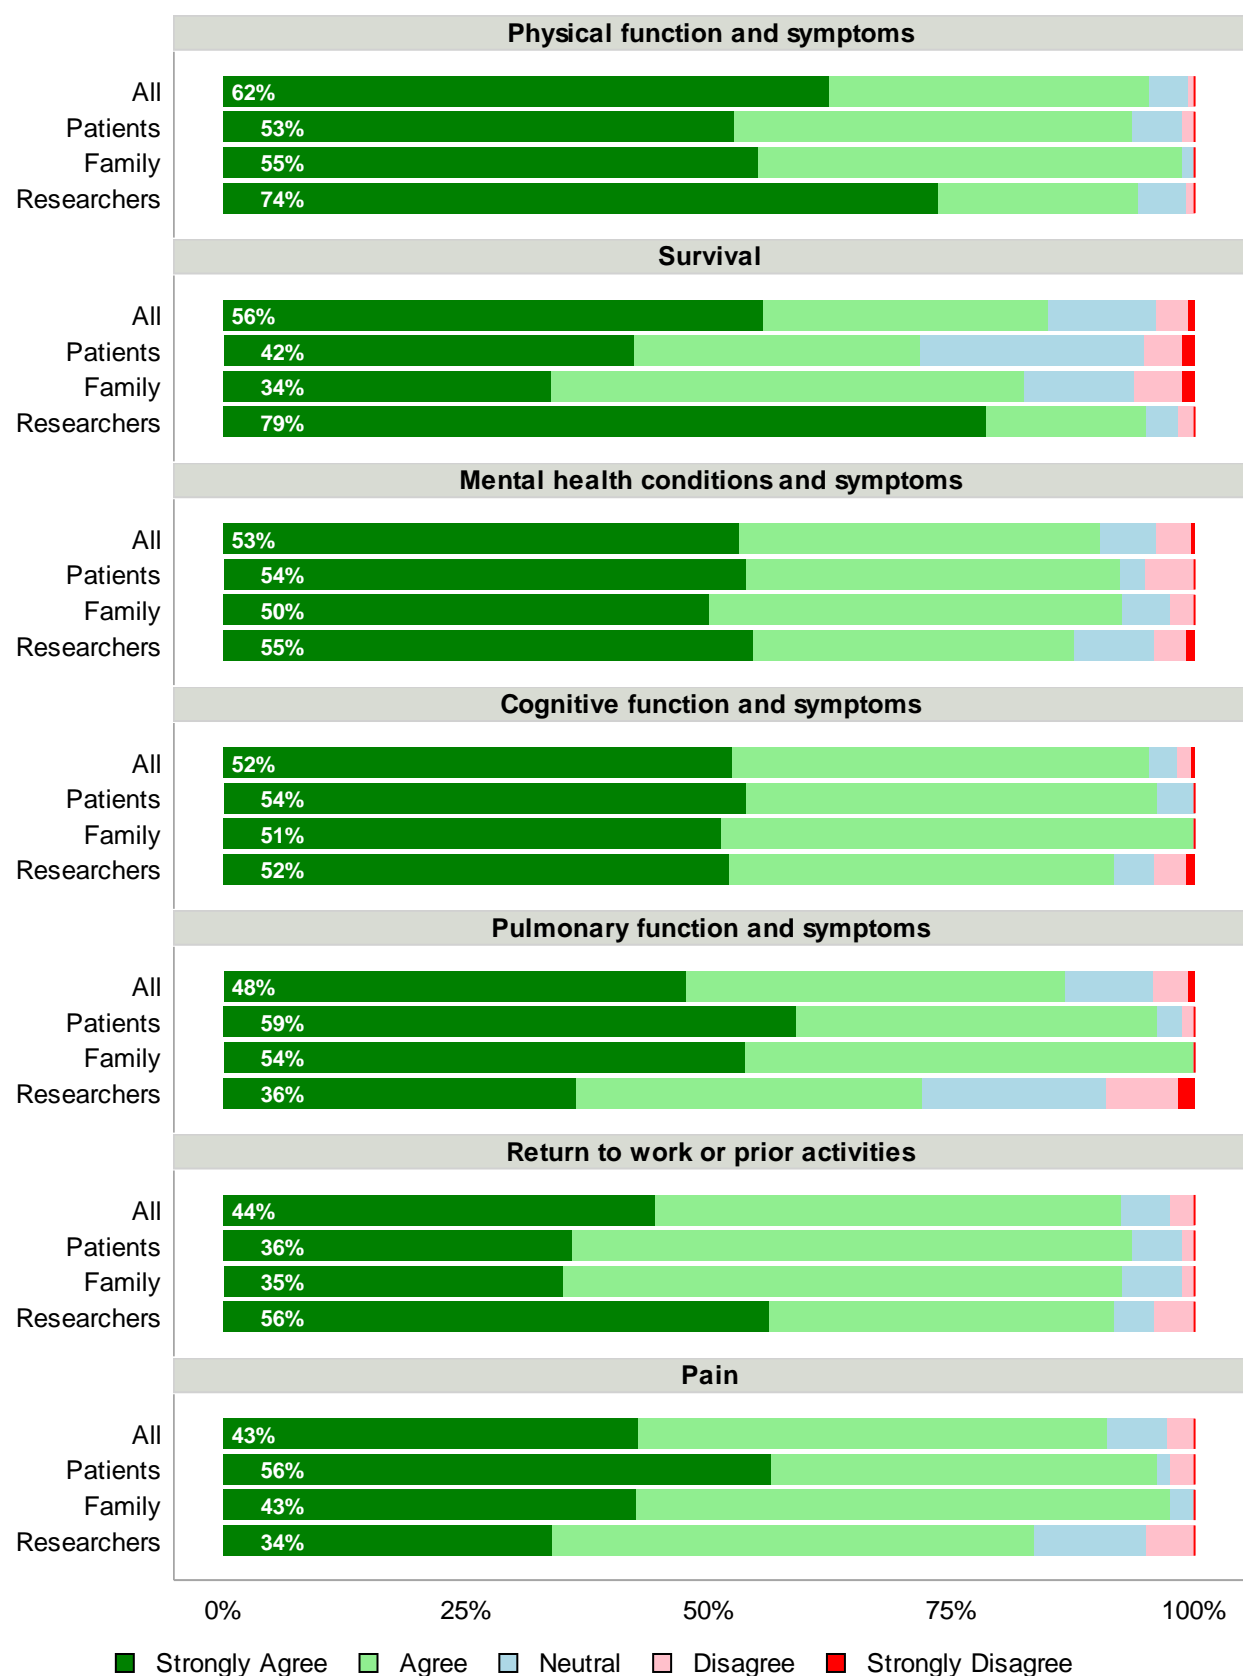

Supplementary Figure.1 Support for requiring measurement of the domain in all studies of post-hospital survivorship in acute respiratory failure patients (page 2 of 3)

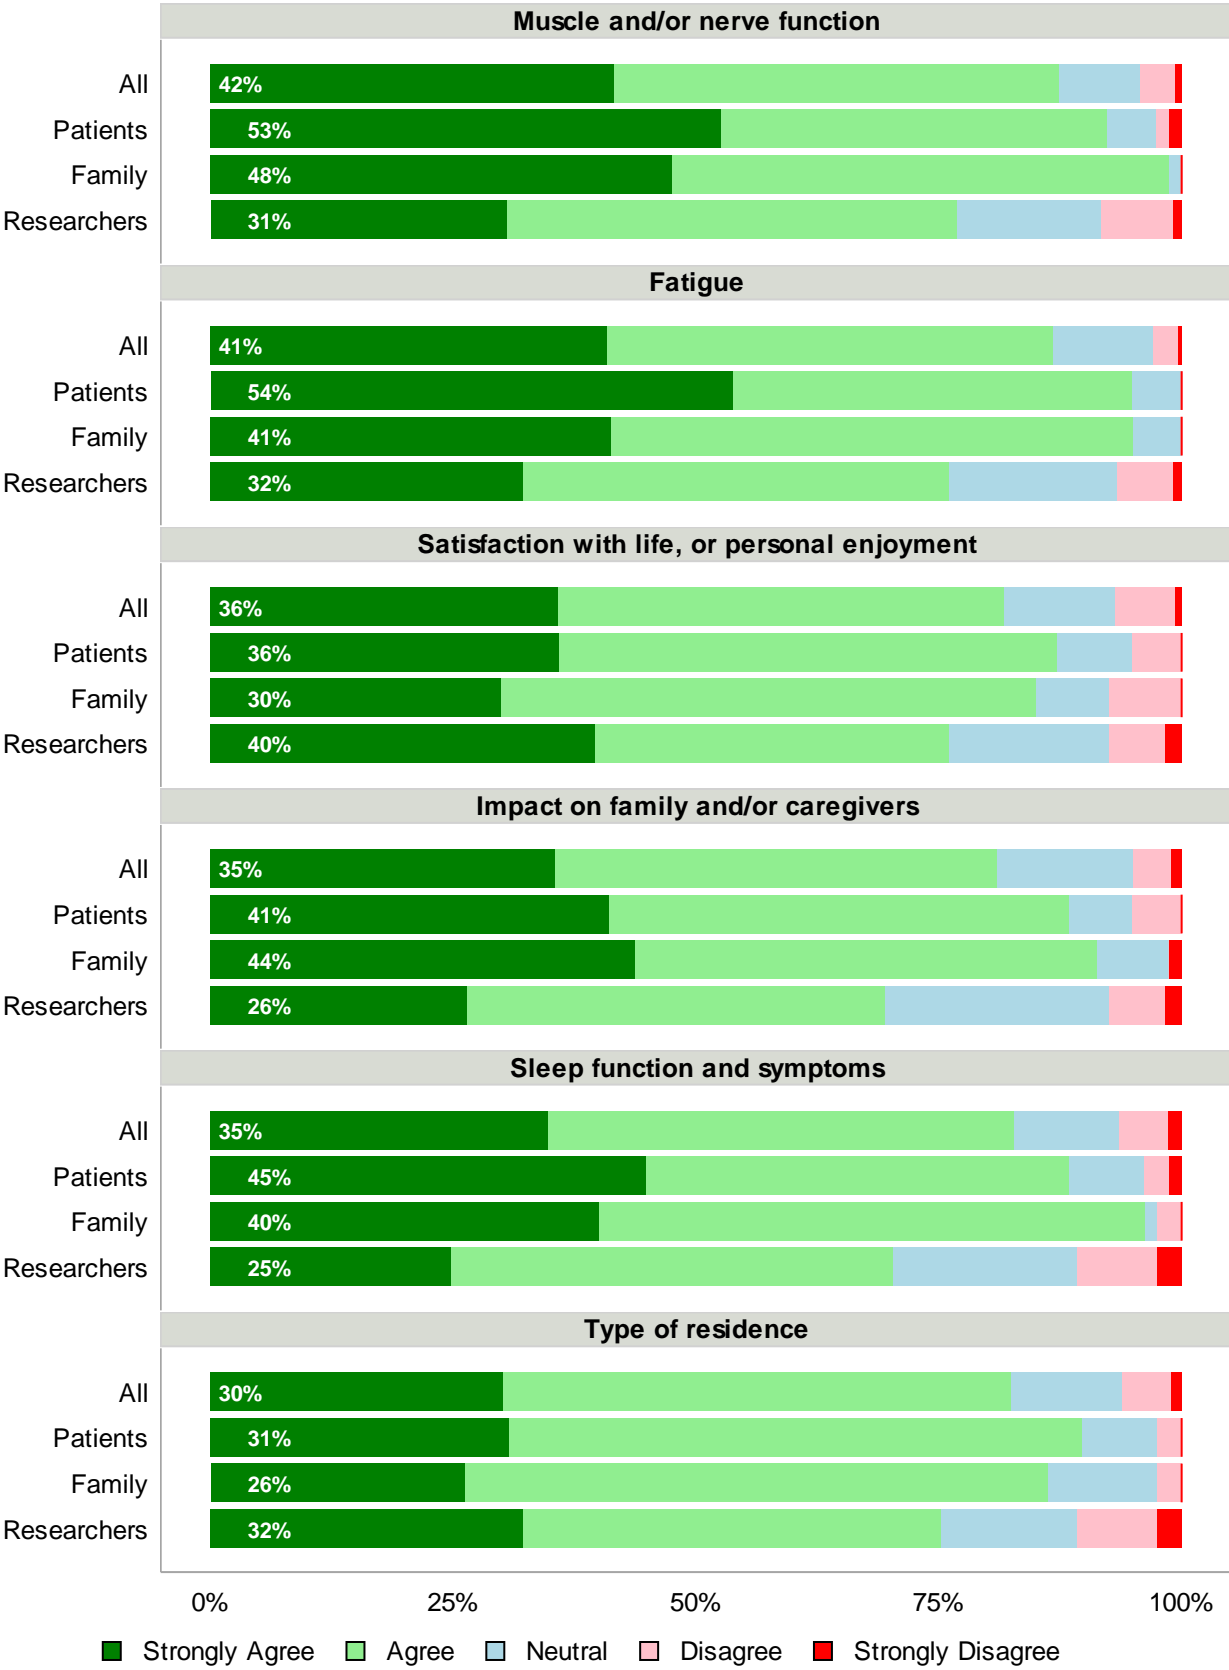

Supplementary Figure.1 Support for requiring measurement of the domain in all studies of post-hospital survivorship in acute respiratory failure patients (page 3 of 3)

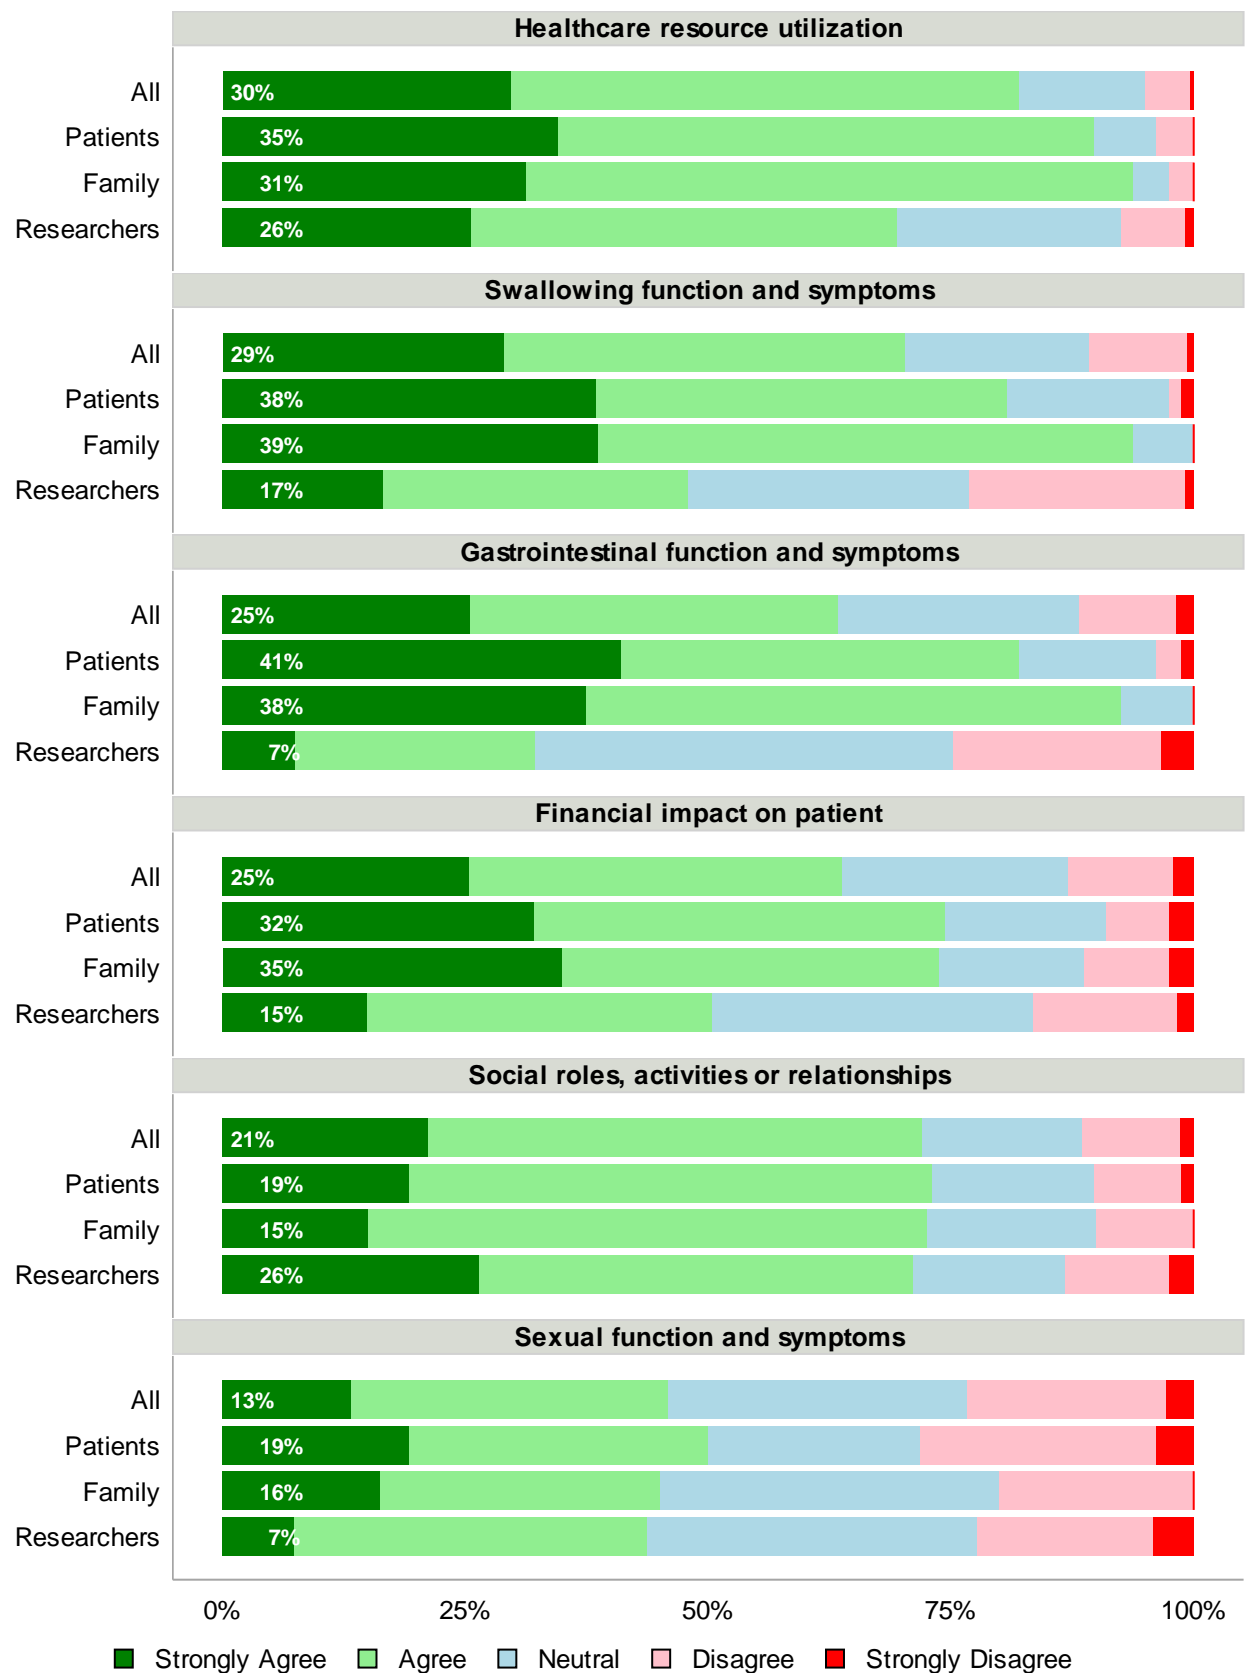

**Supplementary Table3. Matched patient-family pairs (n=55)**

| <b>Domain Questions</b>                       | <b>Number (%) with<br/>Exact Match<br/>in Score<sup>1</sup> within Pair</b> | <b>Number (%) with<br/>≤1 Point Difference<br/>in Score<sup>1</sup> within Pair</b> |
|-----------------------------------------------|-----------------------------------------------------------------------------|-------------------------------------------------------------------------------------|
| Cognitive function and symptoms               | 33 (60)                                                                     | 55 (100)                                                                            |
| Physical function and symptoms                | 34 (62)                                                                     | 54 (98)                                                                             |
| Pulmonary function and symptoms               | 34 (62)                                                                     | 54 (98)                                                                             |
| Mental health conditions and symptoms         | 33 (60)                                                                     | 53 (96)                                                                             |
| Pain                                          | 26 (47)                                                                     | 53 (96)                                                                             |
| Fatigue                                       | 30 (55)                                                                     | 52 (95)                                                                             |
| Return to work or prior activities            | 29 (53)                                                                     | 52 (95)                                                                             |
| Muscle and/or nerve function                  | 26 (47)                                                                     | 52 (95)                                                                             |
| Healthcare resource utilization               | 27 (49)                                                                     | 51 (93)                                                                             |
| Gastrointestinal function and symptoms        | 23 (42)                                                                     | 51 (93)                                                                             |
| Type of residence                             | 28 (51)                                                                     | 50 (91)                                                                             |
| Impact on family and/or caregivers            | 30 (55)                                                                     | 49 (89)                                                                             |
| Swallowing function and symptoms              | 24 (44)                                                                     | 49 (89)                                                                             |
| Sleep function and symptoms                   | 32 (58)                                                                     | 48 (87)                                                                             |
| Satisfaction with life, or personal enjoyment | 28 (51)                                                                     | 47 (85)                                                                             |
| Financial impact on patient                   | 23 (42)                                                                     | 46 (84)                                                                             |
| Survival                                      | 22 (40)                                                                     | 44 (80)                                                                             |
| Social roles, activities or relationships     | 26 (47)                                                                     | 43 (78)                                                                             |
| Sexual function and symptoms                  | 18 (33)                                                                     | 36 (65)                                                                             |

<sup>1</sup> Responses scored using a 5-point scale (“strongly disagree”, “disagree”, “neutral”, “agree”, and “strongly agree”) with higher score indicating greater agreement
